# Supplementary material for: DNA binding selectivity of oligopyridine-ruthenium(ii)-lysine conjugate
Source: Royal Society of Chemistry journal article supplement (doi:10.1039/c0dt00554a), 2010-11-26
Supplement: c0dt00554a.pdf [file c0dt00554a.pdf]

**DS2.** CD and LD information.

CD parameters: Temperature 25 °C, speed 200 nm/min, bandwidth 2nm, step 0.5nm, averaging time 1s, accumulations 3; CD was calibrated by standard procedure using ACS (0.06% aqueous solution in 1cm couette).

LD parameters: Temperature 25 °C, speed 500 nm/min, bandwidth 2nm, step 0.5nm, averaging time 0.25s, accumulations 2. Flow LD spectra were collected by using a flow Couette cell in a Jasco J-720 spectropolarimeter adapted for LD measurements. The flow cell consists of a fixed outer cylinder and a rotating solid quartz inner cylinder, separated by a gap of 0.5 mm, giving a total pathlength of 1 mm. The rotational speed of the inner cylinder was 1200RPM.
